# Supplementary material
Source: HighWire-hosted journal article supplement (https://bibliotheek.ehb.be/content/38/3/205)
Supplement: inline-supplementary-material-3 [file inline-supplementary-material-3.pdf]

## Version 2 – Supplementary File 3

## Target-Controlled Infusion Sedation Flowsheet (V2)

## Key

 $C_{PT}$  – target plasma concentration $C_{ET}$  – target effect site concentration

OAA/S – Observer's Assessment of Alertness/Sedation Scale

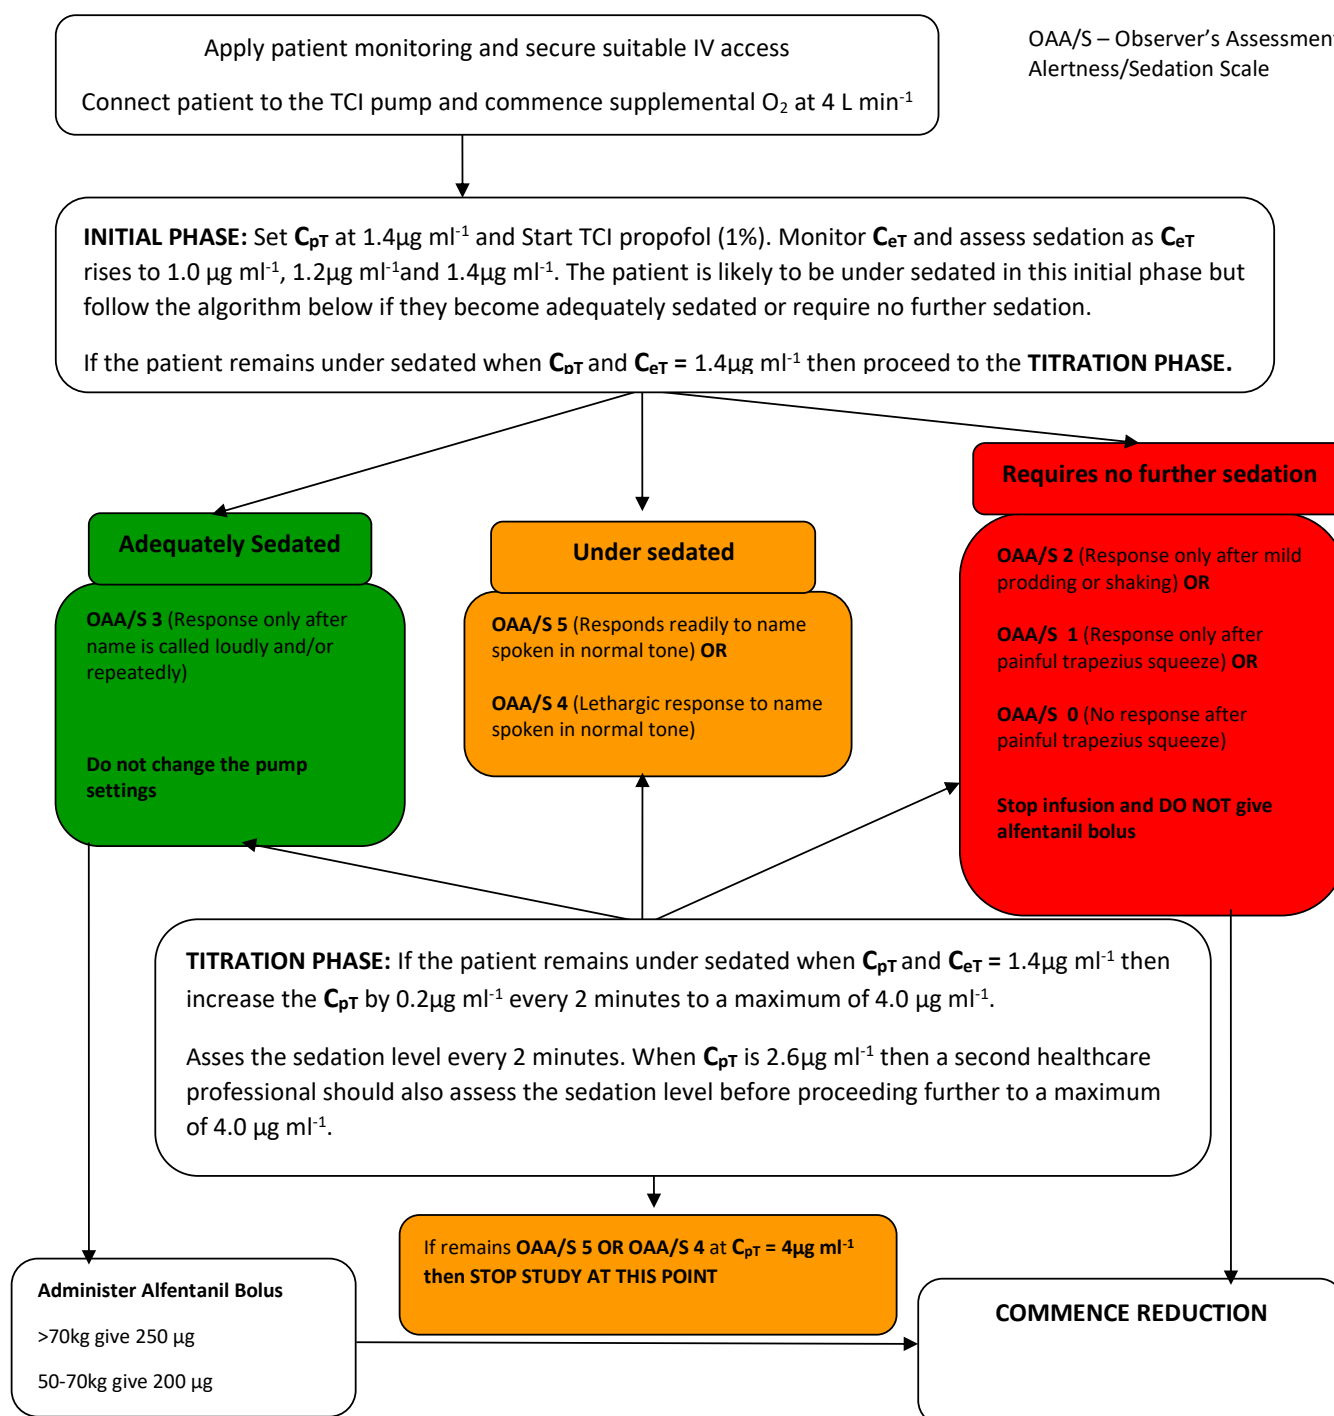

On completion of the reduction the infusion should be stopped and the patient observed until complete recovery

If an adverse event occurs, the TCI should be stopped immediately
